# Supplementary material for: The Viromes of Six Ecosystem Service Provider Parasitoid Wasps
Source: MDPI journal article supplement (doi:10.3390/v15122448), 2023-12-16
Supplement: s1 [file s1]

# Supplementary Information

## The Viromes of Six Ecosystem Service Providers Parasitoid Wasps

**Gabriela B. Caldas-Garcia<sup>1</sup>, Vinícius Castro Santos<sup>2</sup>, Paula Luize Camargos Fonseca<sup>1,3</sup>, João Paulo Pereira de Almeida<sup>2</sup>, Marco Antônio Costa<sup>4</sup>, Eric Roberto Guimarães Rocha Aguiar<sup>1, \*1</sup>**

<sup>1</sup> Virus Bioinformatics laboratory, Centro de Biotecnologia e Genética, Universidade Estadual de Santa Cruz, Ilhéus 45662-900, Brazil; gabrielabcg@gmail.com (G.B.C.-G.); camargos.paulaluize@gmail.com (P.L.C.F.)

<sup>2</sup> Department of Biochemistry and Immunology, Instituto de Ciências Biológicas, Universidade Federal de Minas Gerais, Belo Horizonte 30270-901, Brazil; vini8cs@gmail.com (V.C.S.); joaopaulobio@ufmg.br (J.P.P.d.A.)

<sup>3</sup> Department of Genetics, Instituto de Ciências Biológicas, Universidade Federal de Minas Gerais, Belo Horizonte 30270-901, Brazil

<sup>4</sup> Departament of Biological Sciences, Universidade Estadual de Santa Cruz, Ilhéus 45662-900, Brazil; costama@uesc.br

\* Correspondence: ericgdp@gmail.com

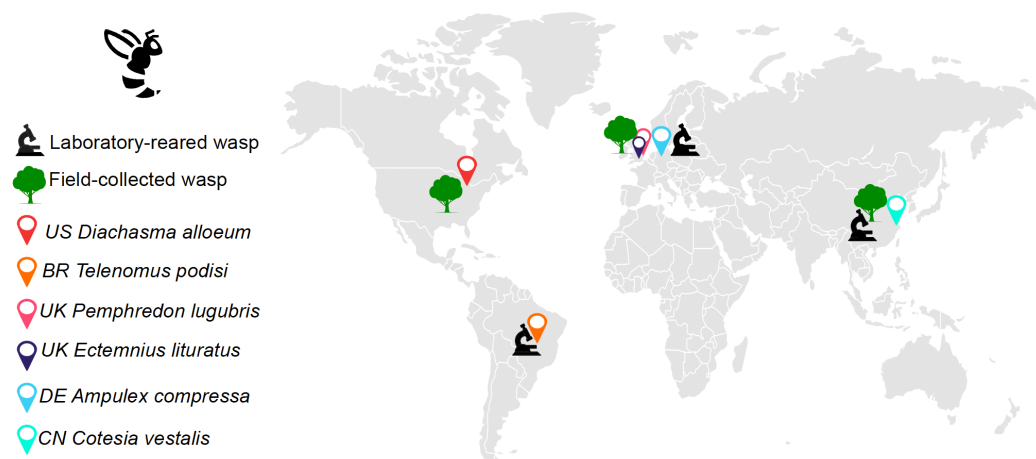

**Supplementary Figure S1. Geographical distribution of libraries used in the study classified by wasp species.**

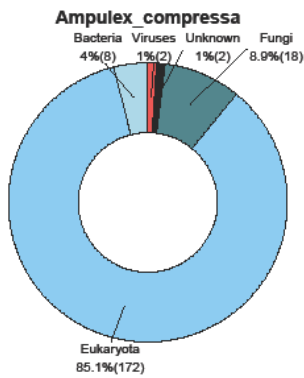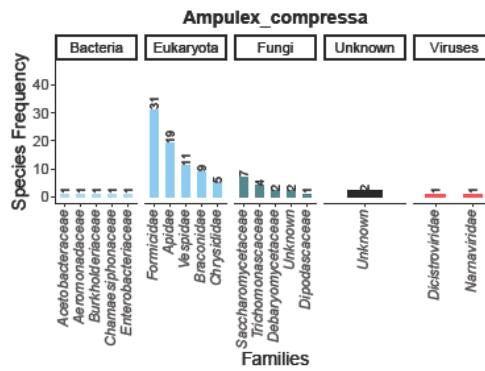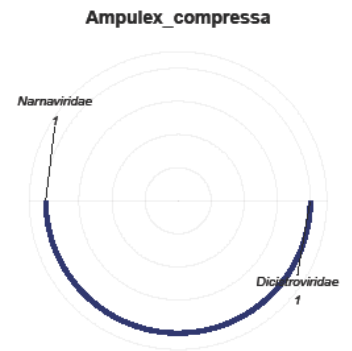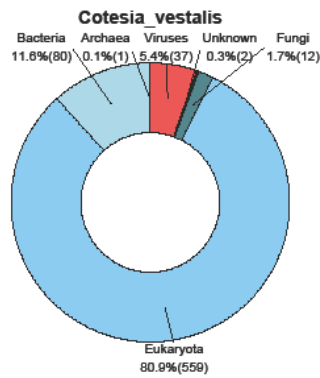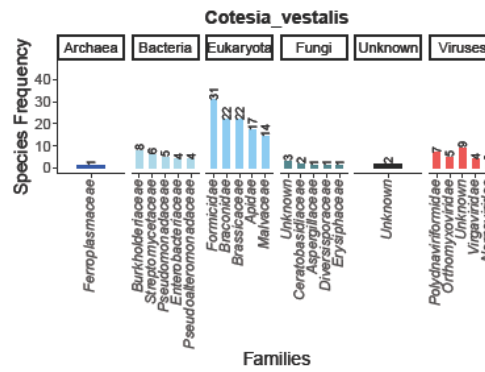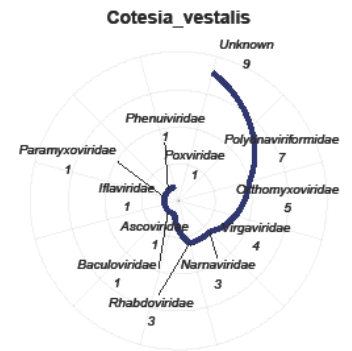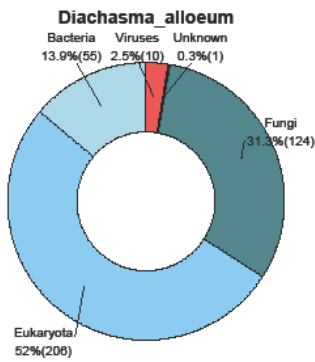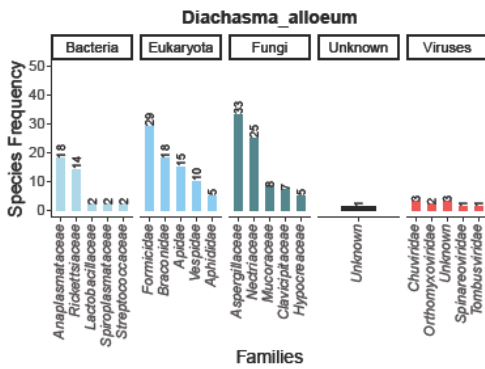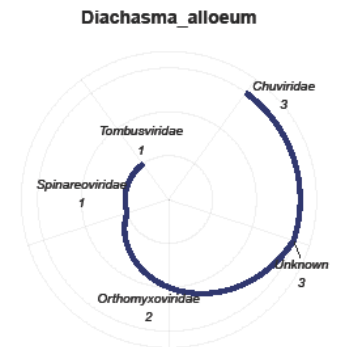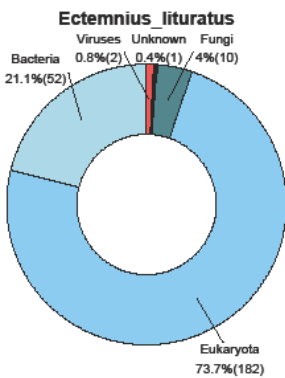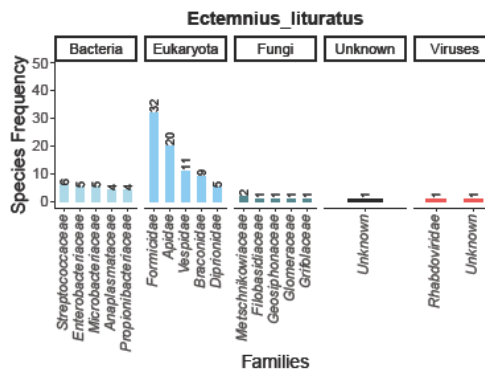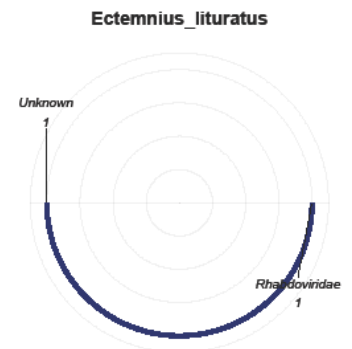

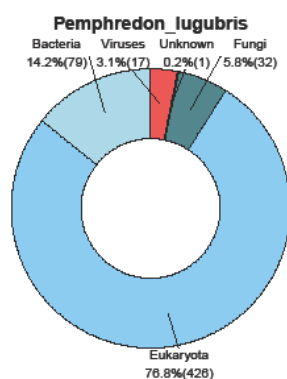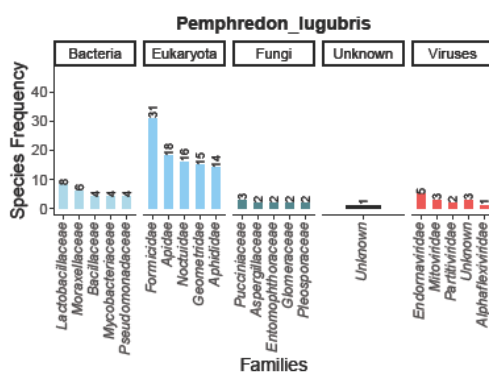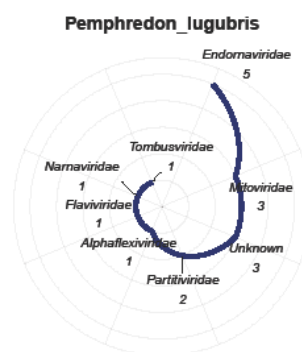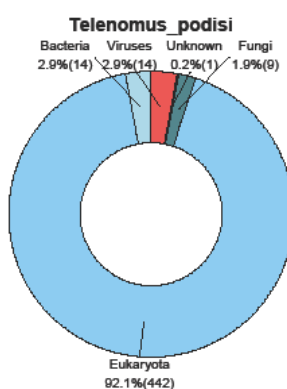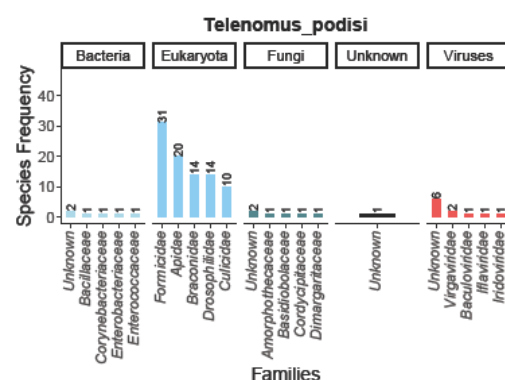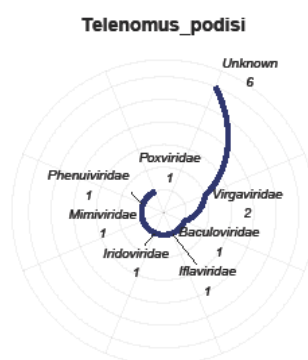

### Supplementary Figure S2. Metagenomics analysis grouped by species of parasitoid wasps.

In order: *A. compressa*, *C. vestalis*, *D. allozum*, *E. lituratus*, *P. lugubris*, and *T. podisi*. On the left, donut plot showing percentages of organisms' diversity found by kingdom. The categories are Eukaryota, Bacteria, Fungi, Viruses, and Unknown. On the middle, bar charts with details on the families within each kingdom (x-axis) and the species frequency by family (y-axis). On the right, radar plot showing the diversity of viral families by parasitoid species.

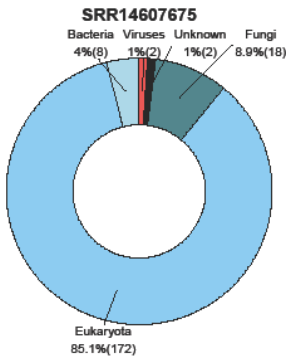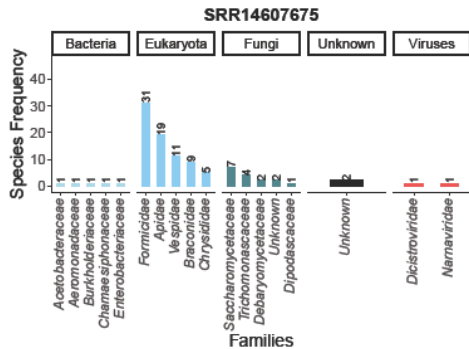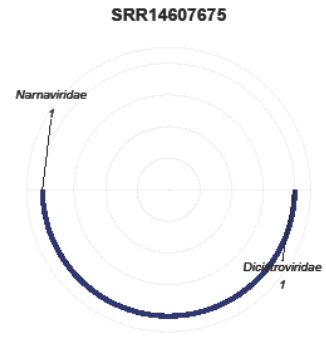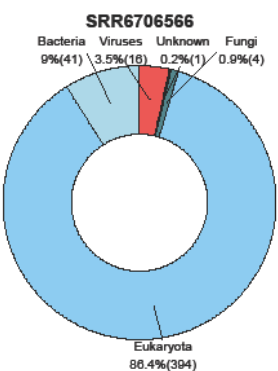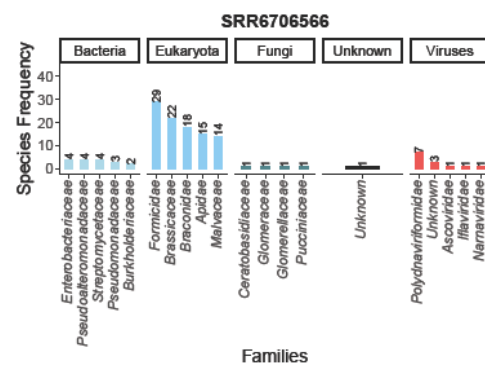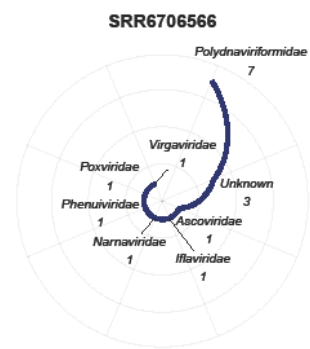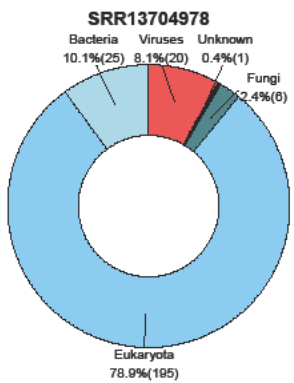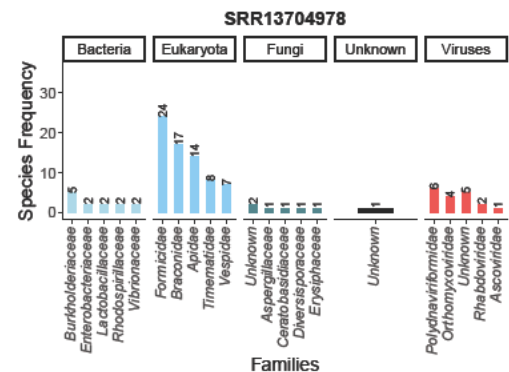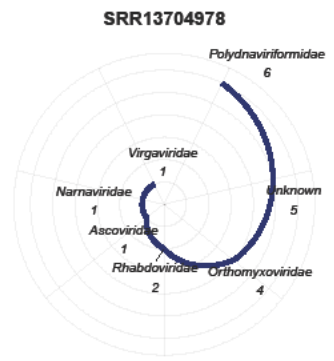

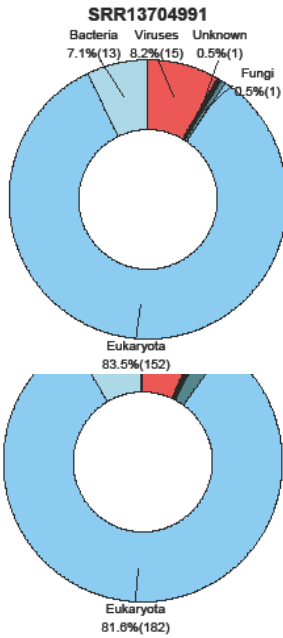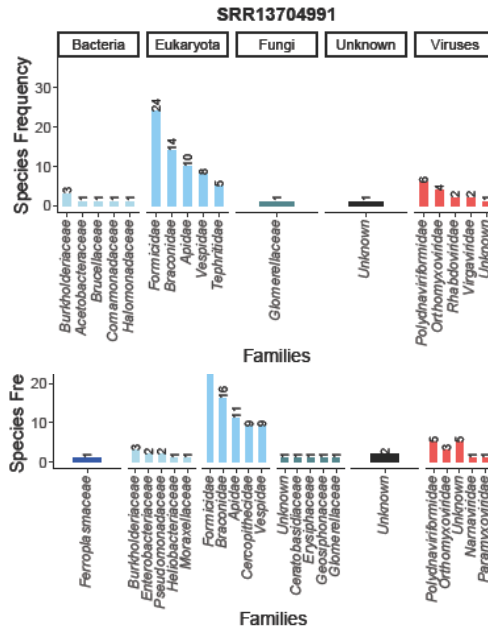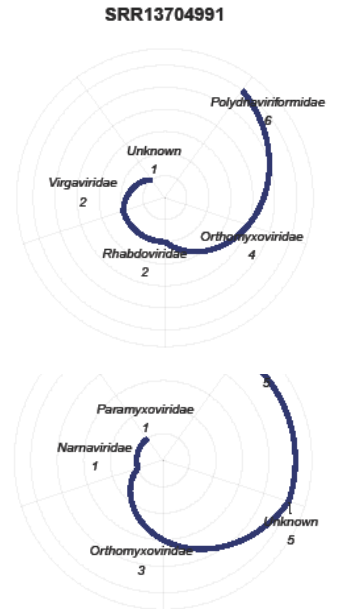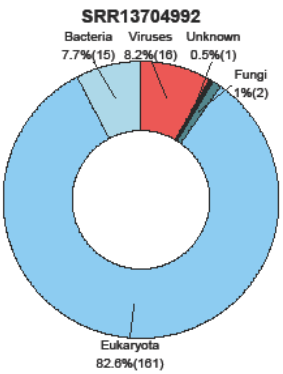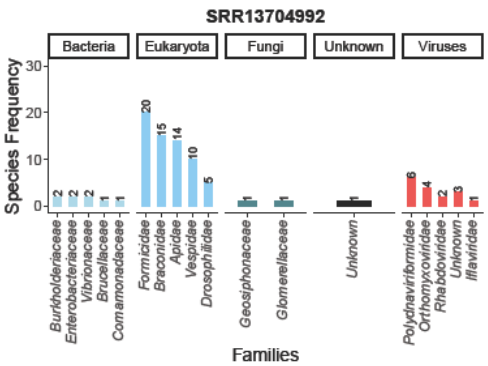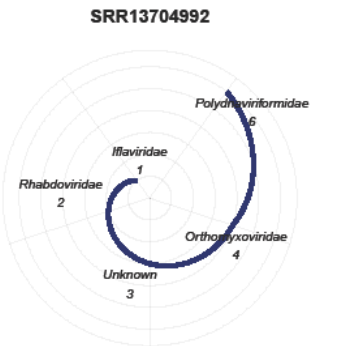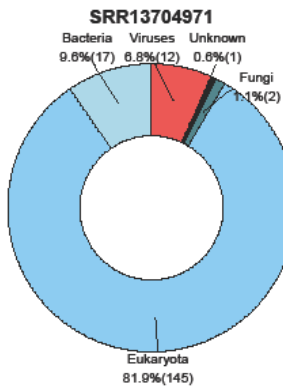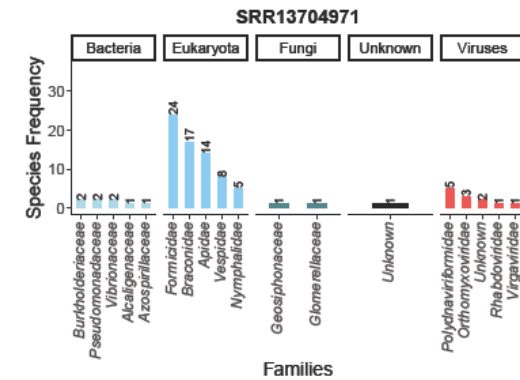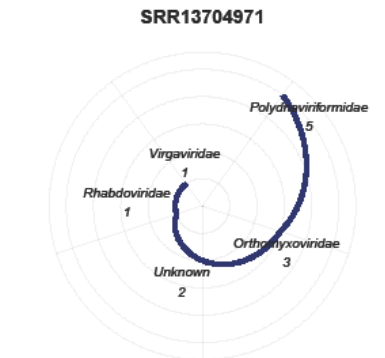

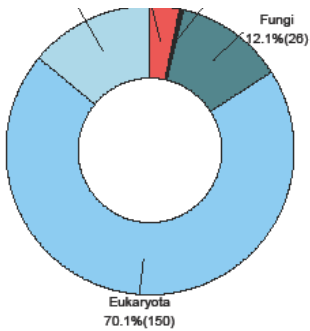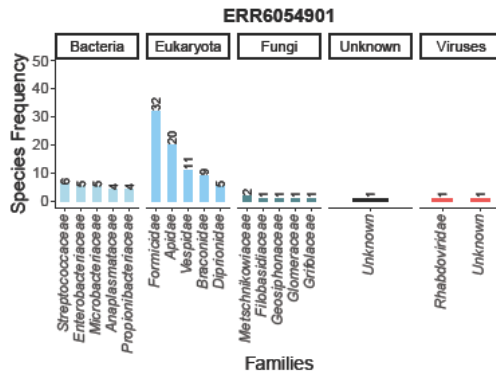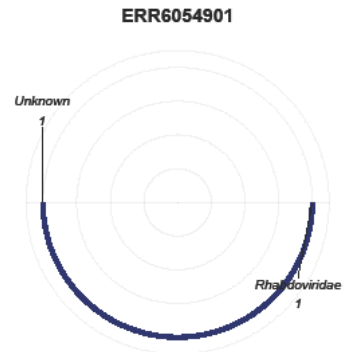

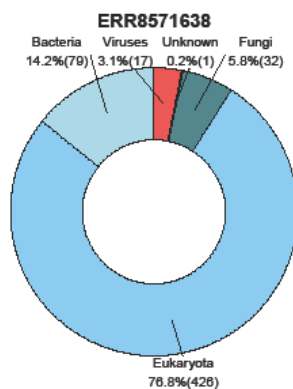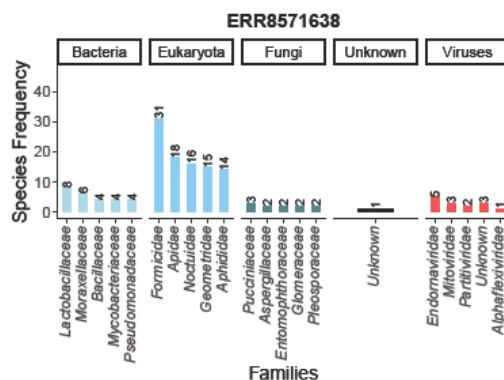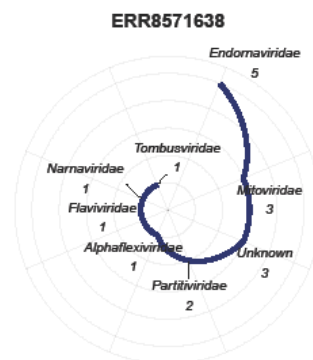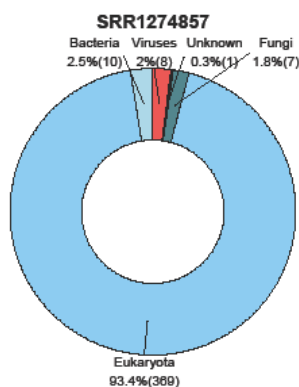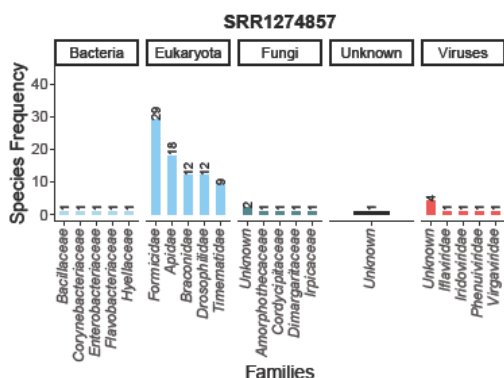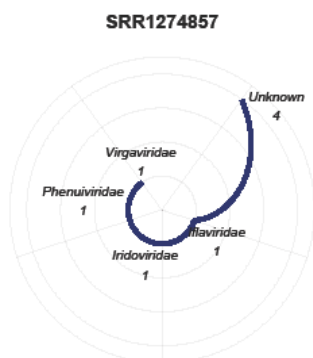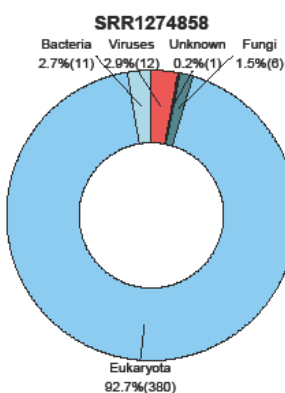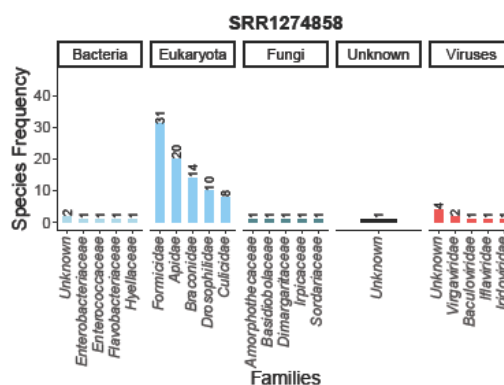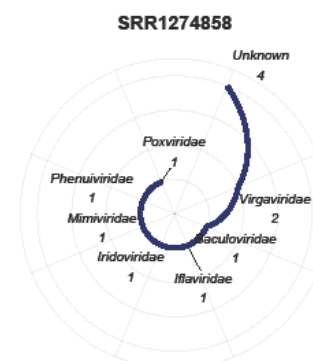

**Supplementary Figure S3. Metagenomics analysis for each RNA-seq library included in the study.** In order: SRR14607675 (*A. compressa*); SRR6706566, SRR13704978, SRR13704979, SRR13704980, SRR13704991, SRR13704992, SRR13704971 (*C. vestalis*); SRR2041626, SRR2040481 (*D. alloeum*); ERR6054901 (*E. lituratus*); ERR8571638 (*P. lugubris*); and SRR1274857, SRR1274858 (*T. podisi*). On the left, donut plot showing percentages of organisms' diversity found by kingdom. The categories are Eukaryota, Bacteria, Fungi, Viruses, and Unknown. On the middle, bar charts with details on the families within each kingdom (x-axis) and the species frequency by family (y-axis). On the right, radar plot showing the diversity of viral families by parasitoid species.



Lasius neglectus virus 2 12,041 nt

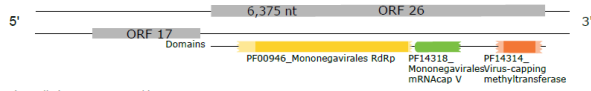

Gudgenby Calliphora mononega-like virus 12,763 nt

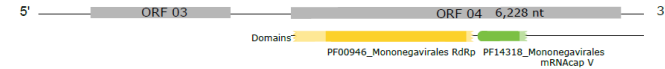

Sanya virga-like virus 1 7,145 nt

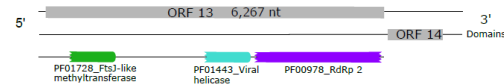

Wuhan insect virus 16 6,684 nt

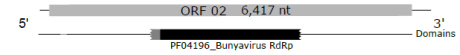

Wuhan ant virus 7,202 nt

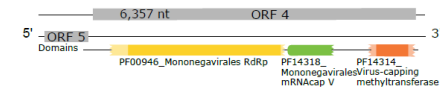

Megastigmus ssRNA, partial genome 12,061 nt

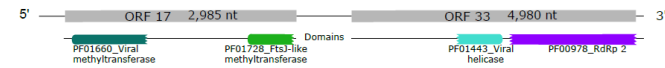

Hymenopteran chu-related virus OKIAV147 7,082 nt

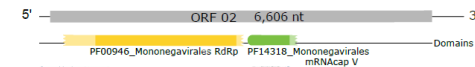

Xiang:

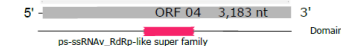

Hangzhou mitovirus 4 2,376 nt

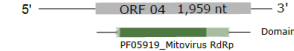

Dill cryptic virus 2 segment RNA 1 2,430 nt

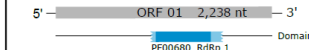

Dill cryptic virus segment RNA 2 2,354 nt

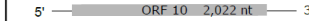

Phasmatodean orthomyxo-related virus OKIAV172 segment 2 2,439 nt

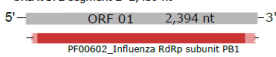

Phasmatodean orthomyxo-related virus OKIAV172 segment 1 2,504 nt

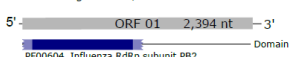

Hymenopteran orthomyxo-related virus OKIAV171 segment 3 2,216 nt

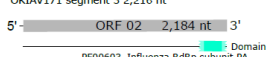

Hymenopteran orthomyxo-related virus OKIAV173 segment 4 1,623 nt

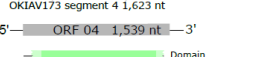

Blattodean orthomyxo-related virus OKIAV181 segment 5 1,827 nt

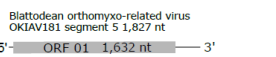

Hymenopteran orthomyxo-related virus OKIAV173 segment 2 2,455 nt

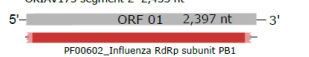

Phasmatodean orthomyxo-related virus OKIAV172 segment 1 2,504 nt

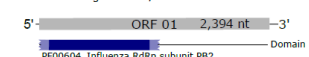

Hymenopteran orthomyxo-related virus OKIAV173 segment 3 2,300 nt

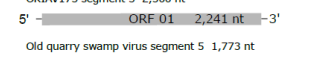

Old quarry swamp virus segment 5 1,773 nt

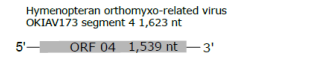

Hymenopteran orthomyxo-related virus OKIAV173 segment 4 1,623 nt

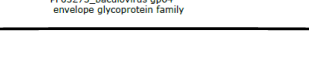

Lily alphaendornavirus isolate B1, complete genome 16,483 nt

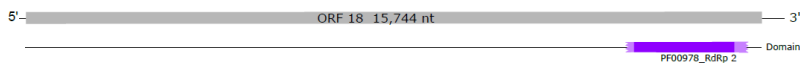

Geranium carolinianum endornavirus 14,625 nt

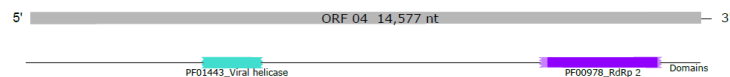

Hallsjon virus, complete genome 13,476 nt

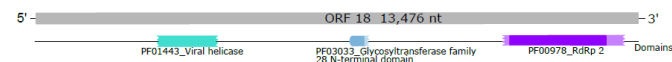

Entomophthora muscae mitovirus 2 RdRp 2,408 nt

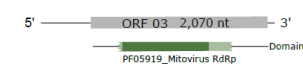

Telenomus podisi 8,285 nt: *Halyomorpha halys* virus isolate *T. podisi*

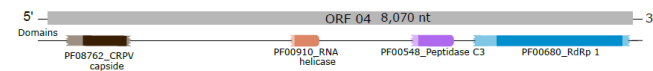

Pemphredon lugubris 1,143nt: Hubei narna-like virus 25 strain isolate *P. lugubris*

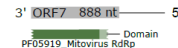

**Supplementary Figure S4. Characterization of segments, ORFs and domains of the closely related sequences to the assembled viral transcripts identified in the work.** All viruses represented in this figure are previously described viruses.
