# Supplementary material for: The Viromes of Six Ecosystem Service Provider Parasitoid Wasps
Source: Viruses. 2023 Dec 16;15(12):2448. doi: 10.3390/v15122448 (PMC10747428; doi:10.3390/v15122448)
Supplement: Supplementary file 1 [file viruses-15-02448-s001.zip › Supplementary tables-EDITED.xlsx]

## Sheet: Table S1 -  Libraries Overview
Bioproject	Library	Geographic location	Species	Sample	Total sequences	Bowtie2 - Aligned 0 times	Bowtie2 - Aligned exactly 1 time	Bowtie2 - Aligned >1 times	Overall alignment rate	Assembled transcripts
PRJNA731354	SRR14607675	Hamburg, Germany	Ampulex compressa	1 individual (adult female)	64137488 reads	18181394 (28.35%)	43744893 (68.20%)	2211201 (3.45%)	86.02%	71393
PRJNA307296	SRR6706566	Hangzhou, China	Cotesia vestalis	Adult female - whole body	29846521 reads	15129281 (50.69%)	12711929 (42.59%)	2005311 (6.72%)	68.67%	70776
PRJNA701718	SRR13704978	Hangzhou, China	Cotesia vestalis	Day 1 female pupae	22408268 reads	12796339 (57.11%)	8267937 (36.90%)	1343992 (6.00%)	70.68%	36391
	SRR13704979	Hangzhou, China	Cotesia vestalis	Day 1 female pupae	23000512 reads	12738119 (55.38%)	8815777 (38.33%)	1446616 (6.29%)	70.69%	78127
	SRR13704980	Hangzhou, China	Cotesia vestalis	Day 1 female pupae	22163534 reads	12495462 (56.38%)	8301240 (37.45%)	1366832 (6.17%)	70.80%	28232
	SRR13704991	Hangzhou, China	Cotesia vestalis	Day 1 male pupae	22100965 reads	12774276 (57.80%)	7954561 (35.99%)	1372128 (6.21%)	68.85%	85137
	SRR13704992	Hangzhou, China	Cotesia vestalis	Day 1 male pupae	22437802 reads	12842416 (57.24%)	8215498 (36.61%)	1379888 (6.15%)	68.98%	32268
	SRR13704971	Hangzhou, China	Cotesia vestalis	Day 1 male pupae	23271518 reads	13274014 (57.04%)	8569001 (36.82%)	1428503 (6.14%)	69.06%	34800
PRJNA283787	SRR2041626	Michigan, USA	Diachasma alloeum	Female - adult	25790912 reads	8859586 (34.35%)	13664862 (52.98%)	3266464 (12.67%)	86.30%	50297
	SRR2040481	Michigan, USA	Diachasma alloeum	Male - adult	24511156 reads	7735753 (31.56%)	12582304 (51.33%)	4193099 (17.11%)	86.58%	50722
PRJEB45145	ERR6054901	Wytham Great Wood, UK	Ectemnius lituratus	Female - head - thorax	19617680 reads	7040031 (35.89%)	12341007 (62.91%)	236642 (1.21%)	81.13%	8616
PRJEB50712	ERR8571638	Berkshire, United Kingdom	Pemphredon lugubris	Adult - abdomen	17123458 reads	5915151 (34.54%)	8528315 (49.80%)	2679992 (15.65%)	81.75%	9574
PRJNA246261	SRR1274857 (Forward)*	Brasilia, Brazil	Telenomus podisi	Female parasitoids	83015128 reads	66849452 (80.53%)	14106167 (16.99%)	2059509 (2.48%)	19.47%	40247
	SRR1274858 (Reverse)*	Brasilia, Brazil	Telenomus podisi	Female parasitoids	83015128 reads	66849452 (80.53%)	14106167 (16.99%)	2059509 (2.48%)	19.47%	40247
						*Using Telenomus remus genome

## Sheet: Table S2. Overview similarity
BioProject	Sample	Library	Geographic location	Sequence	Length	Hit - Diamond	BLASTs	Length	Query cover	E-value	Ident	Hit ID	Domain (Hmmer)	Status	Phylogenetic tree
PRJNA246261	Female parasitoids	SRR1274857 SRR1274858	Brasília, Brazil	NODE_14_length_8285_cov_136.921750	8285	(polymerase) [rhinovirus B14]	N) Halyomorpha halys virus isolate Beltsville, complete genome	9271	0.99	0.0	8062/8243(98%)	KF699344.1		89% Complete known virus	YES
	[Telenomus podisi]						N) Hubei picorna-like virus 42 strain WHYCM1191 hypothetical protein gene, complete cds	9128	0.99	0.0	6104/8245(74%)	KX884297.1
	[parasitoid wasp - biological control]						X) polyprotein [Halyomorpha halys virus]	3016	0.98	0.0	2708/2723(99%)	YP_008719809.1
	[Distribution: Brazil]						X) hypothetical protein [Hubei picorna-like virus 42]	2980	0.98	0.0	2196/2726(81%)	APG78457.1
				NODE_864_length_3315_cov_80.984663	3315	(polymerase) [rhinovirus B14]	N) Halyomorpha halys virus isolate Beltsville, complete genome	9271	1	0.0	2704/3272(83%)	KF699344.1
							X) polyprotein [Halyomorpha halys virus]	3016	0.97	0.0	1004/1076(93%)	YP_008719809.1
							X) MAG: polyprotein [Sanya nezara viridula iflavirus 1]	2981	0.97	0.0	833/1085(77%)	UHR49796.1
				NODE_5188_length_1434_cov_80.306744	1434	nucleocapsid [La Gloria virus]	N) Rhizophagus irregularis strain A1 chromosome 4	6036189	0.03	0.026	46/55(84%)	CP080923.1
							X) nucleocapsid-like protein [Phlebovirus sp.]	237	0.4	0.0004	55/217(25%)	ULT85615.1
							X) nucleocapsid protein [Toyo virus]	249	0.39	0.040	48/196(24%)	BCT55142.1
				NODE_6561_length_1186_cov_2.639257	1186	replicase-associated polyprotein [Maize-associated pteridovirus]	N) Xiangshan martelli-like virus 3 isolate Novel_32 RNA dependent RNA polymerase and hypothetical protein genes, complete cds	9440	0.17	6e-22	156/213(73%)	OK491508.1	RNA dependent RNA polymerase_2
							X) MAG: RNA dependent RNA polymerase [Xiangshan martelli-like virus 2]	2663	0.41	1e-51	92/166(55%)	UDL14009.1
							X) MAG: RNA dependent RNA polymerase [Xiangshan martelli-like virus 3]	2713	0.41	3e-47	89/166(54%)	UDL14011.1
							X) hypothetical protein [Hubei virga-like virus 1]	2712	0.41	9e-47	87/166(52%)	YP_009337423.1
				NODE_8071_length_989_cov_25.640257	989	polyprotein [megrivirus A2]	N) Halyomorpha halys virus isolate Beltsville, complete genome	9271	0.99	0.0	825/986(84%)	KF699344.1
							X) polyprotein [Halyomorpha halys virus]	3016	0.99	0.0	311/329(95%)	YP_008719809.1
							X) hypothetical protein 1 [Hubei picorna-like virus 42]	2206	0.99	3e-169	262/329(80%)	YP_009336564.1
				NODE_9742_length_821_cov_28.312010	821	replicase-associated polyprotein [Maize-associated pteridovirus]	N) No hit
							X) polyprotein [Riboviria sp.]	2729	0.99	4e-39	104/279(37%)	QTW97796.1
							X) MAG: hypothetical protein, partial [Hubei virga-like virus 1]	2726	0.99	4e-39	104/279(37%)	UUG74046.1
							X) MAG: RNA dependent RNA polymerase [Xiangshan martelli-like virus 3]	2713	0.99	2e-37	97/275(35%)	UDL14011.1
PRJEB50712	Adult - abdomen	ERR8571638	Berkshire, United Kingdom	NODE_6_length_5813_cov_44.726464	5813	YP_009408586.1 polyprotein [Abisko virus]	N) Pemphredon lugubris genome assembly, chromosome: 1	74671469	0.02	1e-44	148/174(85%)	OW121815.1	Viral (Superfamily 1) RNA helicase; RNA dependent RNA polymerase		YES
	[Pemphredon lugubris]						N) Buckhurst virus putative polyprotein and hypothetical protein genes, complete cds	11139	0.07	3e-28	310/457(68%)	KU754516.1
	[digger parasitoid wasp]						X) hypothetical protein [Megastigmus ssRNA virus]	1659	0.5	0.0	429/996(43%)	QDZ71189.1		Fragmented hypothetical protein (60%) + other genes
	[Distribution: Palearctic]						X) MAG: RNA-dependent RNA polymerase [Sanya virga-like virus 1]	2088	0.54	0.0	439/1080(41%)	UHM27517.1
							X) polyprotein [Abisko virus]	2650	0.59	0.0	437/1099(40%)	YP_009408586.1
				NODE_120_length_2694_cov_204.729461	2694	polyprotein [Phaseolus vulgaris endornavirus 3]	N) Geranium carolinianum endornavirus, complete genome	14625	0.06	1e-09	116/164(71%)	MH577297.1		Contig 12 - 11115nt - Peptidase_C97, Viral_helicase1
							X) polyprotein [Lily alphaendornavirus]	5247	0.94	6e-128	277/876(32%)	UPO25292.1
							X) polyprotein [Phaseolus vulgaris endornavirus 3]	4932	0.86	9e-119	249/789(32%)	YP_009551959.1
							X) polyprotein [Geranium carolinianum endornavirus]	4815	0.94	7e-116	268/878(31%)	QBB21108.1
				NODE_198_length_2397_cov_143.966810	2397	RNA-dependent RNA polymerase [Dill cryptic virus 2]	N) Dill cryptic virus 2 isolate IPP_hortorum segment RNA 1, complete sequence	2430	0.97	0.0	1846/2339(79%)	JX971984.1	RdRp	98% complete segment 1 - new virus (segmented)	YES
							N) Cannabis cryptic virus isolate hemp09 RNA-dependent RNA polymerase gene, complete cds	2397	0.97	0.0	1766/2359(75%)	KX709964.1
							X) RNA-dependent RNA polymerase [Dill cryptic virus 2]	745	0.93	0.0	626/749(84%)	YP_007891054.1
							X) RNA-dependent RNA polymerase [Partitiviridae sp.]	746	0.93	0.0	582/746(78%)	QXV86421.1
							X) RNA-dependent RNA polymerase, partial [Cannabis cryptic virus]	746	0.93	0.0	582/749(78%)	QSE03528.1
				NODE_240_length_2271_cov_165.691431	2271	coat protein [Dill cryptic virus 2]	N) Dill cryptic virus 2 isolate IPP_hortorum segment RNA 2, complete sequence	2354	0.99	0.0	1728/2291(75%)	JX971985.1		96% complete segment 2 - new virus (segmented)
							N) Cannabis cryptic virus isolate hemp09 coat protein gene, complete cds	2266	0.99	0.0	1624/2290(71%)	KX709965.1
							X) coat protein [Dill cryptic virus 2]	673	0.88	0.0	521/673(77%)	YP_007891055.1
							X) coat protein [Cannabis cryptic virus]	672	0.88	0.0	478/673(71%)	YP_009293580.1
				NODE_1599_length_1098_cov_21.545544	1098	RNA-dependent RNA polymerase [Erysiphe necator mitovirus 1]	N) MAG: Mitovirus sp. isolate H3_Rhizo_37_scaffold_66110 sequence	1003	0.09	1e-12	82/104(79%)	MN034765.1
							N) MAG: Mitovirus sp. isolate H2_Rhizo_33_scaffold_9937 hypothetical protein (H2Rhizo339937_000001) and RNA-dependent RNA polymerase (H2Rhizo339937_000002) genes, partial cds	1579	0.09	1e-12	82/104(79%)	MN033030.1
							X) MAG: RNA-dependent RNA polymerase [Hangzhou mitovirus 4]	652	0.85	5e-71	139/325(43%)	UHK03173.1	Mitovirus RNA-dependent RNA polymerase	Contig 8 - 2141nt - Mitovir_RNA_pol	YES
							X) MAG: RNA dependent RNA polymerase, partial [Mitoviridae sp.]	415	0.76	2e-69	130/281(46%)	URG16632.1
							X) MAG: RNA-dependent RNA polymerase [Hangzhou altica cyanea mitovirus 1]	659	0.91	2e-69	130/336(39%)	UHK03086.1
				NODE_2629_length_801_cov_21.805249	801	polyprotein [Phaseolus vulgaris endornavirus 3]	N) No hit
							X) polyprotein [Phaseolus vulgaris endornavirus 3]	4932	0.68	2e-14	53/188(28%)	YP_009551959.1
							X) polyprotein [Geranium carolinianum endornavirus]	4815	0.77	2e-10	56/212(26%)	QBB21108.1
							X) polyprotein [Lily alphaendornavirus]	5247	0.58	8e-09	46/158(29%)	UPO25292.1
				NODE_2870_length_750_cov_19.589896	750	polyprotein [Abisko virus]	N) Apoda limacodes genome assembly, chromosome: 16	29018493	0.05	0.013	35/38(92%)	OX291556.1
							X) hypothetical protein [Megastigmus ssRNA virus]	994	0.46	5e-07	44/119(37%)	QDZ71185.1
							X) polyprotein [Abisko virus]	2650	0.44	0.003	36/127(28%)	YP_009408586.1
PRJEB45145	Female - head - thorax	ERR6054901	Wytham Great Wood, UK	NODE_2_length_12682_cov_146.405077	12682	L [Taro vein chlorosis virus]	N) Hymenopteran rhabdo-related virus OKIAV38 cRNA sequence, sequence	12376	0.12	5e-111	783/1132(69%)	MT153454.1		100% complete new virus	YES
	[Ectemnius lituratus]						X) L polymerase RdRp [Lasius neglectus virus 2]	2124	0.49	0.0	1017/2077(49%)	AYW51543.1
	[digger parasitoid wasp]						X) RNA-dependent RNA polymerase [Hymenopteran rhabdo-related virus OKIAV38]	2121	0.49	0.0	1000/2093(48%)	QMP82239.1
	[Distribution: Europe]						X) RNA-dependent RNA polymerase [Wuhan Ant Virus]	2118	0.47	0.0	844/2005(42%)	YP_009304559.1
PRJNA307296	Female - whole body	SRR6706566	Hangzhou, China	NODE_4_length_9075_cov_59.732274	9075	polyprotein [Abisko virus]	N) Abisko virus isolate Abisko-6, complete genome	10187	0.01	4e-09	90/118(76%)	KY662294.1	RdRp , viral RNA helicase, Viral methyltransferase		YES
	[Cotesia vestalis]						N) MAG: Virgaviridae sp. isolate L7-6 RNA-dependent RNA polymerase and hypothetical protein genes, partial cds	2237	0.01	4e-09	94/125(75%)	MZ396037.1
	[Parasitoid wasp - biological control]						N) SsRNA positive-strand virus sp. isolate L4b RNA-dependent RNA polymerase gene, complete cds	8237	0.01	4e-09	94/125(75%)	MW199211.1
	[Distribution: worldwide]						X) MAG: RNA-dependent RNA polymerase [Sanya virga-like virus 1]	2088	0.31	0.0	399/998(40%)	UHM27517.1		100% complete new virus ? (Sanya virga-like virus 1 genome = 7145 nt) MZ209913.1
							X) hypothetical protein [Megastigmus ssRNA virus]	1659	0.32	0.0	396/1003(39%)	QDZ71189.1
							X) hypothetical protein [Hubei virga-like virus 10]	3002	0.6	0.0	387/993(39%)	APG77802.1
				NODE_16_length_6636_cov_17.805916	6636	RNA-dependent RNA polymerase [Cumuto virus]	N) Wuhan insect virus 16 strain arthropodmix13442 RNA-dependent RNA polymerase gene, complete cds	6684	0.1	3e-16	201/291(69%)	KX884733.1		Complete RdRp (new virus)	YES
							N) Bunyavirus sp. strain Bat/VNM/16845_8 RNA-dependent RNA polymerase (RdRp) gene, complete cds	6587	0.04	1e-14	201/293(69%)	KX886785.1
							X) RNA-dependent RNA polymerase [Wuhan insect virus 16]	2138	0.92	0.0	860/2077(41%)	APG79216.1		Complete RdRp (new virus)
							X) putative RdRp-complex [Linepithema humile bunyan-like virus 1]	2184	0.91	0.0	770/2081(37%)	AXA52548.1
							X) RNA-dependent RNA polymerase [Gonipterus platensis bunyan-like virus]	2198	0.92	0.0	731/2137(34%)	QWX94187.1
				NODE_6246_length_1278_cov_2.611157	1278	polyprotein [Diamondback moth iflavirus]	N) Diamondback moth iflavirus isolate Guangzhou, complete genome	9580	1	0.0	1236/1278(97%)	KY435608.1
						Cv_Contig4	X) polyprotein [Diamondback moth iflavirus]	3012	0.99	0.0	415/425(98%)	YP_009361829.1
				NODE_9864_length_868_cov_3.063211	868	Nucleocapsid [Phasi Charoen-like phasivirus]	N) No hit						No domains	Segmented virus 1-glycoprotein, 2-RdRp, 3- nucleocapsid
							X) hypothetical protein KQX54_006023 [Cotesia glomerata]	335	0.8	3e-59	113/242(47%)	KAH0539601.1
							X) nucleoprotein [Hymenopteran phenui-related virus OKIAV275]	314	0.72	4e-26	72/215(33%)	QPL15371.1
				NODE_14410_length_562_cov_1.171134	562	polyprotein [Diamondback moth iflavirus]	N) Diamondback moth iflavirus isolate Guangzhou, complete genome	9580	1	0.0	528/562(94%)	KY435608.1
						Cv_Contig5	X) RNA helicase domain-containing protein, partial [Escherichia coli]	1272	0.99	6e-124	183/187(98%)	WP_176232343.1
							X) polyprotein [Diamondback moth iflavirus]	3012	0.99	6e-120	182/187(97%)	YP_009361829.1
PRJNA701718	Day 1 female	SRR13704978	Hangzhou, China	NODE_205_length_5484_cov_35.047531	5484	polyprotein [Abisko virus]	N) MAG: Virgaviridae sp. isolate L7-6 RNA-dependent RNA polymerase and hypothetical protein genes, partial cds	2237	0.02	3e-09	94/125(75%)	MZ396037.1	Viral (Superfamily 1) RNA helicase; RNA dependent RNA polymerase		YES - same as line 74
	[Cotesia vestalis]						X) MAG: RNA-dependent RNA polymerase [Sanya virga-like virus 1]	2088	0.52	0.0	399/998(40%)	UHM27517.1		Fragmented RdRp (48%) + other genes
	[Parasitoid wasp - biological control]						X) hypothetical protein [Megastigmus ssRNA virus]	1659	0.53	0.0	396/1003(39%)	QDZ71189.1
	[Distribution: worldwide]													same virus line 74
				NODE_2670_length_2545_cov_2.122771	2545	polyprotein [Abisko virus]	N) Cosmia pyralina genome assembly, chromosome: 1	31758668	0.03	6e-07	68/85(80%)	OX276342.1
							X) hypothetical protein [Megastigmus ssRNA virus]	994	0.68	8e-74	184/586(31%)	QDZ71185.1
							X) MAG: hypothetical protein FVV1_gp1 [Fushun virga-like virus 1]	2396	0.95	7e-67	223/828(27%)	UHM27628.1
				NODE_2779_length_2499_cov_185.302642	2499	polymerase PB1 [Quaranjavirus quaranfilense]	N) Hymenopteran orthomyxo-related virus OKIAV173 segment 2 cRNA sequence, sequence	2455	0.34	5e-21	460/710(65%)	MT153296.1
							N) Blattodean orthomyxo-related virus OKIAV181 segment 2 cRNA sequence, sequence	2466	0.2	5e-21	223/324(69%)	MT153541.1
						1/5 (segmented)	X) polymerase PB1 [Phasmatodean orthomyxo-related virus OKIAV172]	797	0.94	0.0	386/796(48%)	QMP82248.1		Complete new virus (5 segments: segment 3 = 2,302 nt; segment 4 = 1,564 nt; segment 5 = 1,789 nt; segment 1 = 2,504 nt; segment 2 = 2,439 nt linear cRNA)	YES
							X) polymerase PB1, partial [Blattodean orthomyxo-related virus OKIAV181]	807	0.9	0.0	369/764(48%)	QMP82344.1
				NODE_2849_length_2470_cov_185.710823	2470	polymerase basic 2 protein [Wellfleet Bay virus]	N) Andrena haemorrhoa genome assembly, chromosome: 3	42634267	0.03	6e-07	65/82(79%)	OU342942.1
							N) Hubei earwig virus 1 strain GCM19162 segment 1 polymerase PB2 gene, complete cds	2474	0.06	2e-06	110/156(71%)	KX883859.1
						2/5 (segmented)	X) polymerase PB2, partial [Phasmatodean orthomyxo-related virus OKIAV172]	808	0.92	3e-132	269/774(35%)	QMP82297.1		Complete new virus (5 segments: segment 3 = 2,302 nt; segment 4 = 1,564 nt; segment 5 = 1,789 nt; segment 1 = 2,504 nt; segment 2 = 2,439 nt linear cRNA)
							X) polymerase PB2 [Hymenopteran orthomyxo-related virus OKIAV175]	797	0.94	2e-123	263/793(33%)	QPL15313.1
				NODE_3364_length_2256_cov_162.769160	2256	polymerase acidic protein [Wellfleet Bay virus]	N) Hymenopteran orthomyxo-related virus OKIAV171 segment 3 polymerase PA (PA) gene, partial cds	2216	0.08	4e-09	133/193(69%)	MW288181.1
						3/5 (segmented)	X) polymerase PA, partial [Hymenopteran orthomyxo-related virus OKIAV171]	728	0.93	5e-148	265/728(36%)	QPL15315.1		Complete new virus (5 segments: segment 3 = 2,302 nt; segment 4 = 1,564 nt; segment 5 = 1,789 nt; segment 1 = 2,504 nt; segment 2 = 2,439 nt linear cRNA)
							X) polymerase PA [Hubei earwig virus 1]	721	0.93	8e-145	265/729(36%)	APG77882.1
				NODE_5531_length_1577_cov_440.674000	1577	hemagglutinin protein [Wellfleet Bay virus]	N) Hydraecia micacea genome assembly, chromosome: 22	15836034	0.03	0.029	46/55(84%)	OU611797.1
						4/5 (segmented)	X) hemagglutinin [Hymenopteran orthomyxo-related virus OKIAV173]	512	0.83	9e-45	121/452(27%)	QMP82117.1		Complete new virus (5 segments: segment 3 = 2,302 nt; segment 4 = 1,564 nt; segment 5 = 1,789 nt; segment 1 = 2,504 nt; segment 2 = 2,439 nt linear cRNA)
							X) hemagglutinin [Phasmatodean orthomyxo-related virus OKIAV172]	502	0.9	2e-43	134/500(27%)	QMP82330.1
				NODE_5762_length_1518_cov_196.446218	1518	hypothetical protein [Quaranjavirus quaranfilense]	N) Eupsilia transversa genome assembly, chromosome: 15	15031245	0.04	0.008	49/61(80%)	OU611887.1
						5/5 (segmented)	X) nucleocapsid protein [Blattodean orthomyxo-related virus OKIAV181]	543	0.66	1e-21	60/175(34%)	QMP82185.1		Complete new virus (5 segments: segment 3 = 2,302 nt; segment 4 = 1,564 nt; segment 5 = 1,789 nt; segment 1 = 2,504 nt; segment 2 = 2,439 nt linear cRNA)
							X) nucleoprotein [Hymenopteran orthomyxo-related virus OKIAV171]	543	0.76	2e-20	62/195(32%)	QPL15393.1
				NODE_9909_length_757_cov_2.447059	757	RNA-dependent RNA polymerase [Hubei narna-like virus 15]	N) MAG: Sand whiting narna-like virus isolate TRINITY_DN150556_c0_g1_i3_len2929 genomic sequence, sequence	2929	0.14	2e-13	86/110(78%)	OL804383.1	No domains
							N) MAG: Hangzhou narnavirus 2 isolate YSP1FY393, complete genome	2971	0.15	0.0003	85/119(71%)	MZ209739.1
							X) MAG: RNA-dependent RNA polymerase, partial [Guiyang narnavirus 1]	745	0.99	1e-73	131/273(48%)	UHR49783.1		Fragmented RdRp (36%)
							X) MAG: RNA-dependent RNA polymerase [Hangzhou narnavirus 2]	888	0.92	2e-70	121/237(51%)	UHK02994.1
				NODE_11945_length_524_cov_2.411633	524	polymerase basic 1 protein [Wellfleet Bay virus]	N) Hymenopteran orthomyxo-related virus OKIAV174 segment 2 polymerase PB1 (PB1) gene, complete cds	2442	0.19	0.009	72/100(72%)	MW288228.1
							X) PB1 [Wuhan Mothfly Virus]	678	0.97	1e-40	82/170(48%)	AJG39096.1
							X) polymerase PB1, partial [Hymenopteran orthomyxo-related virus OKIAV175]	794	0.97	3e-39	76/170(45%)	QPL15368.1
PRJNA701718	Day 1 female	SRR13704979	Hangzhou, China	NODE_180_length_5269_cov_68.215331	5269	polyprotein [Abisko virus]	N) MAG: Virgaviridae sp. isolate L7-6 RNA-dependent RNA polymerase and hypothetical protein genes, partial cds	2237	0.02	3e-09	94/125(75%)	MZ396037.1			Same virus of line 98 (NODE_205_length_5484_cov_35.047531)
	[Cotesia vestalis]						X) hypothetical protein [Megastigmus ssRNA virus]	1659	0.55	0.0	396/1003(39%)	QDZ71189.1		Fragmented hypothetical protein (60%) + other genes
				NODE_2290_length_2625_cov_2.777865	2625	polyprotein [Abisko virus]	N) Cosmia pyralina genome assembly, chromosome: 1	31758668	0.03	6e-07	68/85(80%)	OX276342.1	Viral methyltransferase; Chroparavirus methyltransferase
	[Parasitoid wasp - biological control]						X) hypothetical protein [Megastigmus ssRNA virus]	994	0.78	7e-75	208/740(28%)	QDZ71185.1
	[Distribution: worldwide]						X) MAG: hypothetical protein FVV1_gp1 [Fushun virga-like virus 1]	2396	0.95	5e-67	227/853(27%)	UHM27628.1		Fragmented hypothetical protein (35%)
				NODE_2668_length_2456_cov_159.344683	2456	polymerase basic 2 protein [Wellfleet Bay virus]	N) Andrena haemorrhoa genome assembly, chromosome: 3	42634267	0.03	6e-07	65/82(79%)	OU342942.1
							N) Hubei earwig virus 1 strain GCM19162 segment 1 polymerase PB2 gene, complete cds	2474	0.06	2e-06	110/156(71%)	KX883859.1
						1/5 (segmented)	X) polymerase PB2, partial [Phasmatodean orthomyxo-related virus OKIAV172]	808	0.92	3e-132	272/776(35%)	QMP82297.1		Complete virus (5 segments, as above)
							X) polymerase PB2 [Hymenopteran orthomyxo-related virus OKIAV175]	797	0.94	2e-123	263/793(33%)	QPL15313.1
				NODE_2699_length_2444_cov_130.466836	2444	polymerase PB1 [Quaranjavirus quaranfilense]	N) Hymenopteran orthomyxo-related virus OKIAV173 segment 2 cRNA sequence, sequence	2455	0.35	5e-21	460/710(65%)	MT153296.1			YES - same virus as line 106
							N) Blattodean orthomyxo-related virus OKIAV181 segment 2 cRNA sequence, sequence	2466	0.21	5e-21	223/324(69%)	MT153541.1
						2/5 (segmented)	X) polymerase PB1 [Phasmatodean ortho+H432:O432myxo-related virus OKIAV172]	797	0.96	0.0	386/796(48%)	QMP82248.1		Complete virus (5 segments, as above)
							X) polymerase PB1, partial [Blattodean orthomyxo-related virus OKIAV181]	807	0.92	0.0	369/764(48%)	QMP82344.1
				NODE_2990_length_2303_cov_131.556155	2303	polymerase acidic protein [Wellfleet Bay virus]	N) Hymenopteran orthomyxo-related virus OKIAV171 segment 3 polymerase PA (PA) gene, partial cds	2216	0.08	4e-09	133/193(69%)	MW288181.1
						3/5 (segmented)	X) polymerase PA, partial [Hymenopteran orthomyxo-related virus OKIAV171]	728	0.91	1e-147	265/728(36%)	QPL15315.1		Complete virus (5 segments, as above)
							X) polymerase PA [Hubei earwig virus 1]	721	0.91	7e-145	265/729(36%)	APG77882.1
				NODE_5825_length_1490_cov_184.246992	1490	hypothetical protein [Quaranjavirus quaranfilense]	N) Eupsilia transversa genome assembly, chromosome: 15	15031245	0.04	0.008	49/61(80%)	OU611887.1
							X) nucleocapsid protein [Blattodean orthomyxo-related virus OKIAV181]	543	0.68	1e-21	60/175(34%)	QMP82185.1
						4/5 (segmented)	X) nucleoprotein [Hymenopteran orthomyxo-related virus OKIAV171]	543	0.77	2e-20	62/195(32%)	QPL15393.1		Complete virus (5 segments, as above)
				NODE_6458_length_1355_cov_340.640063	1355	hemagglutinin protein [Wellfleet Bay virus]	N) PREDICTED: Cotesia glomerata uncharacterized LOC123275205 (LOC123275205), transcript variant X5, mRNA	1885	0.03	3e-08	46/48(96%)	XM_044743164.1
						5/5 (segmented)	X) hemagglutinin [Hymenopteran orthomyxo-related virus OKIAV173]	512	0.86	8e-28	91/366(25%)	QMP82117.1		Complete virus (5 segments, as above)
							X) hemagglutinin [Hubei earwig virus 1]	505	0.84	2e-24	100/367(27%)	APG77884.1
				NODE_10110_length_803_cov_1.407713	803	nucleocapsid [Simian orthorubulavirus]	N) Mammalian orthorubulavirus 5 isolate XJ033, complete genome	15246	1	0.0	799/803(99%)	MN604146.1
							X) nucleocapsid protein [Parainfluenza virus 5]	509	0.9	5e-176	240/241(99%)	QOS14588.1
							X) nucleocapsid protein [Mammalian orthorubulavirus 5]	509	0.9	2e-175	239/241(99%)	UIX55996.1
				NODE_11312_length_682_cov_1.327273	682	P protein [Simian orthorubulavirus]	N) Parainfluenza virus 5 strain AGS, complete genome	15246	1	0.0	680/682(99%)	KX060176.1
							X) phosphoprotein [Parainfluenza virus 5]	392	0.98	3e-150	218/227(96%)	QOS14590.1
							X) P [Parainfluenza virus 5] [Parainfluenza virus 5]	392	0.97	4e-150	216/221(98%)	ANE10780.1
				NODE_12067_length_613_cov_35.464552	613	polymerase acidic protein [Wellfleet Bay virus]	N) No hit
							X) polymerase PA [Hymenopteran orthomyxo-related virus OKIAV174]	738	0.97	4e-36	74/200(37%)	QPL15297.1
							X) polymerase PA [Hubei earwig virus 1]	721	0.98	1e-32	77/205(38%)	APG77882.1
				NODE_13061_length_527_cov_63.133333	527	polymerase PB1 [Quaranjavirus quaranfilense]	N) Anoplius nigerrimus genome assembly, chromosome: 5	21052755	0.59	4e-20	214/314(68%)	OU612081.1
							X) polymerase PB1, partial [Hymenopteran orthomyxo-related virus OKIAV173]	807	0.96	2e-60	103/169(61%)	QMP82112.1
							X) polymerase PB1 [Phasmatodean orthomyxo-related virus OKIAV172]	797	0.96	1e-59	102/169(60%)	QMP82248.1
PRJNA701718	Day 1 female	SRR13704980	Hangzhou, China	NODE_184_length_5730_cov_75.943039	5730	RNA-dependent RNA polymerase [Ageratum latent virus 1998]	N) MAG: Virgaviridae sp. isolate L7-6 RNA-dependent RNA polymerase and hypothetical protein genes, partial cds	2237	0.02	3e-09	94/125(75%)	MZ396037.1	Viral (Superfamily 1) RNA helicase; RNA dependent RNA polymerase		Same virus as lines 98 and 137.
	[Cotesia vestalis]						N) SsRNA positive-strand virus sp. isolate L4b RNA-dependent RNA polymerase gene, complete cds	8237	0.02	3e-09	94/125(75%)	MW199211.1
	[Parasitoid wasp - biological control]						X) MAG: RNA-dependent RNA polymerase [Sanya virga-like virus 1]	2088	0.5	0.0	399/998(40%)	UHM27517.1		Fragmented RdRp (48%) + other genes
	[Distribution: worldwide]						X) hypothetical protein [Megastigmus ssRNA virus]	1659	0.5	0.0	396/1003(39%)	QDZ71189.1
PRJNA701718	Day 1 male	SRR13704991	Hangzhou, China	NODE_1327_length_2881_cov_384.901213	2881	hypothetical protein 1 [Hubei rhabdo-like virus 1]	N) No hit
	[Cotesia vestalis]						X) putative nucleocapsid protein [Lariophagus distinguendus negative-strand RNA virus 1]	454	0.16	1e-24	56/154(36%)	QWT43292.1	No domains	Fragmented putative nucleocapsid protein (34%) + other genes
							X) nucleocapsid protein [Hymenopteran rhabdo-related virus OKIAV109]	455	0.17	5e-22	54/167(32%)	QMP82140.1		Same as Contig1: 12260nt (SRR13704980); NODE_1_length_12294_cov_202.674249_g0_i0: 12294nt (SRR13704979); 12073nt (SRR13704978); 7068nt (SRR13704991).
	[Parasitoid wasp - biological control]			NODE_1865_length_2524_cov_151.418063	2524	polymerase basic 2 protein [Wellfleet Bay virus]	N) Hubei earwig virus 1 strain GCM19162 segment 1 polymerase PB2 gene, complete cds	2474	0.06	2e-06	110/156(71%)	KX883859.1
	[Distribution: worldwide]					1/5 (segmented)	X) polymerase PB2, partial [Phasmatodean orthomyxo-related virus OKIAV172]	808	0.87	3e-129	262/750(35%)	QMP82297.1
							X) polymerase PB2 [Hymenopteran orthomyxo-related virus OKIAV175]	797	0.91	2e-122	260/786(33%)	QPL15313.1
				NODE_2032_length_2442_cov_124.724313	2442	polymerase PB1 [Quaranjavirus quaranfilense]	N) Hymenopteran orthomyxo-related virus OKIAV173 segment 2 cRNA sequence, sequence	2455	0.35	5e-21	460/710(65%)	MT153296.1			YES - same virus as line 106
						2/5 (segmented)	X) polymerase PB1 [Phasmatodean orthomyxo-related virus OKIAV172]	797	0.96	0.0	386/796(48%)	QMP82248.1
							X) PB1 [Photinus pyralis orthomyxo-like virus 1]	801	0.96	0.0	373/792(47%)	AVR52567.1
				NODE_2371_length_2276_cov_110.491132	2276	polymerase acidic protein [Wellfleet Bay virus]	N) Hymenopteran orthomyxo-related virus OKIAV171 segment 3 polymerase PA (PA) gene, partial cds	2216	0.08	4e-09	133/193(69%)	MW288181.1
						3/5 (segmented)	X) polymerase PA, partial [Hymenopteran orthomyxo-related virus OKIAV171]	728	0.92	1e-148	266/728(37%)	QPL15315.1
							X) polymerase PA [Hubei earwig virus 1]	721	0.92	1e-145	267/732(36%)	APG77882.1
				NODE_3673_length_1804_cov_219.094962	1804	nucleoprotein [Wellfleet Bay virus]	N) Eupsilia transversa genome assembly, chromosome: 15	15031245	0.03	0.010	49/61(80%)	OU611887.1
						4/5 (segmented)	X) nucleocapsid protein [Blattodean orthomyxo-related virus OKIAV181]	543	0.86	7e-72	163/538(30%)	QMP82185.1
							X) nucleoprotein [Hymenopteran orthomyxo-related virus OKIAV175]	541	0.86	4e-70	160/529(30%)	QPL15348.1
				NODE_4131_length_1677_cov_3.722500	1677	polyprotein [Abisko virus]	N) MAG: Virgaviridae sp. isolate L7-6 RNA-dependent RNA polymerase and hypothetical protein genes, partial cds	2237	0.07	8e-10	94/125(75%)	MZ396037.1
							X) MAG: RNA-dependent RNA polymerase [Sanya virga-like virus 1]	2088	0.32	1e-38	89/187(48%)	UHM27517.1
							X) RNA-dependent RNA polymerase [Frankliniella occidentalis associated virga-like virus 2]	551	0.32	2e-36	87/184(47%)	QNM37806.1
				NODE_4533_length_1570_cov_386.849967	1570	hemagglutinin protein [Wellfleet Bay virus]	N) Hydraecia micacea genome assembly, chromosome: 22	15836034	0.03	0.029	46/55(84%)	OU611797.1
						5/5 (segmented)	X) hemagglutinin [Hymenopteran orthomyxo-related virus OKIAV173]	512	0.83	8e-45	121/452(27%)	QMP82117.1
							X) hemagglutinin [Phasmatodean orthomyxo-related virus OKIAV172]	502	0.91	2e-43	134/500(27%)	QMP82330.1
				NODE_7845_length_963_cov_229.696388	963	nucleocapsid [Hymenopteran rhabdo-related virus]	N) No hit						Same as line 187	Same as Contig1: 12260nt (SRR13704980); NODE_1_length_12294_cov_202.674249_g0_i0: 12294nt (SRR13704979); 12073nt (SRR13704978); 7068nt (SRR13704991).
							X) nucleocapsid [Hymenopteran rhabdo-related virus]	455	0.88	7e-30	95/291(33%)	UOS86045.1
							X) putative nucleocapsid protein [Lariophagus distinguendus negative-strand RNA virus 1]	454	0.74	3e-21	79/245(32%)	QWT43292.1
				NODE_9157_length_799_cov_2.587258	799	polyprotein [Abisko virus]	N) Abisko virus isolate Abisko-6, complete genome	10187	0.17	4e-09	107/145(74%)	KY662294.1
							X) polyprotein [Abisko virus]	2650	0.91	3e-68	121/245(49%)	YP_009408586.1
							X) MAG: RNA-dependent RNA polymerase [Fushun naranga aenescens virga-like virus 1]	2705	0.91	4e-65	116/244(48%)	UHM27606.1
PRJNA701718	Day 1 male	SRR13704992	Hangzhou, China	NODE_7565_length_962_cov_1.929944	962	RNA-dependent RNA polymerase [Ageratum latent virus 1998]	N) Apotomis betuletana genome assembly, chromosome: 14	23526798	0.1	7e-08	78/103(76%)	OW026312.1
	[Cotesia vestalis]						X) hypothetical protein [Hubei virga-like virus 10]	3002	0.99	5e-86	145/319(45%)	APG77802.1
							X) RdRp [Hubei virga-like virus 9]	2947	0.99	1e-82	142/319(45%)	YP_009336553.1
PRJNA701718	Day 1 male	SRR13704971	Hangzhou, China	NODE_4426_length_1691_cov_2.537794	1691	RNA-dependent RNA polymerase [Ageratum latent virus 1998]	N) MAG: Sanya virga-like virus 1 isolate QWXCSY134, complete genome	7145	0.05	1e-06	74/98(76%)	MZ209913.1
	[Cotesia vestalis]						X) MAG: RNA-dependent RNA polymerase [Sanya virga-like virus 1]	2088	0.56	3e-70	115/237(49%)	UHM27517.1
							X) MAG: RNA-dependent RNA polymerase [Fushun virga-like virus 1]	702	0.55	6e-64	116/234(50%)	UHM27629.1
PRJNA283787	Female - adult	SRR2041626	Michigan, USA	NODE_7_length_11634_cov_96.224113	11634	RNA-dependent RNA polymerase [Hubei diptera virus 11]	N) Gudgenby Calliphora mononega-like virus strain GudgCaA_DN63315-6 putative nucleoprotein, hypothetical protein, putative glycoprotein, and RNA-dependent RNA polymerase genes, complete cds	12763	0.28	0.0	1914/2871(67%)	MT129693.1	Mononegavirales RNA dependent RNA polymerase; Mononegavirales mRNA-capping region V	91% Complete new virus	YES
	[Diachasma alloeum]						N) Hymenopteran anphe-related virus OKIAV73 cRNA sequence, sequence	3215	0.19	2e-110	1483/2271(65%)	MT153357.1
	[Parasitoid wasp - biological control]						X) RNA-dependent RNA polymerase [Gudgenby Calliphora mononega-like virus]	2075	0.51	0.0	1032/2026(51%)	QIJ70030.1
	[Distribution: North America]						X) RNA-dependent RNA polymerase [Hymenopteran anphe-related virus OKIAV71]	2036	0.49	0.0	812/1951(42%)	QPL15379.1
							X) RNA-dependent RNA polymerase, partial [Shuangao Fly Virus 2]	1966	0.5	0.0	841/1995(42%)	YP_010084240.1
				NODE_3293_length_2488_cov_46.616934	2488	polymerase PB2 [Quaranjavirus quaranfilense]	N) Photinus pyralis orthomyxo-like virus 2 PB2 gene, complete cds	2506	0.02	6e-07	48/54(89%)	MG972994.1
						1/5 (segmented)	X) polymerase PB2, partial [Phasmatodean orthomyxo-related virus OKIAV172]	808	0.85	5e-115	227/715(32%)	QMP82297.1		≅ Complete new virus (5 segments)
							X) polymerase PB2 [Hubei earwig virus 1]	804	0.84	1e-106	218/718(30%)	APG77881.1
				NODE_3364_length_2456_cov_23.995419	2456	polymerase PB1 [Quaranjavirus quaranfilense]	N) Hubei earwig virus 1 strain WGML148351 polymerase PB1 gene, partial cds	2332	0.06	6e-13	123/169(73%)	KX883882.1			YES
						2/5 (segmented)	X) polymerase PB1, partial [Hymenopteran orthomyxo-related virus OKIAV173]	807	0.91	0.0	371/754(49%)	QMP82112.1		≅ Complete new virus (5 segments)
							X) polymerase PB1 [Hymenopteran orthomyxo-related virus OKIAV174]	799	0.97	0.0	365/795(46%)	QPL15381.1
				NODE_3936_length_2235_cov_37.124312	2235	polymerase acidic protein [Wellfleet Bay virus]	N) Xestia c-nigrum genome assembly, chromosome: 1	29102575	0.05	2e-06	93/127(73%)	OU745244.1
							N) MAG: Byreska virus isolate BW2_Byreska polymerase-associated protein (PA) gene, complete cds	2211	0.04	7e-06	69/90(77%)	ON059768.1
						3/5 (segmented)	X) polymerase PA, partial [Hymenopteran orthomyxo-related virus OKIAV173]	755	0.95	1e-150	270/739(37%)	QMP82372.1		≅ Complete new virus (5 segments)
							X) polymerase PA, partial [Hymenopteran orthomyxo-related virus OKIAV171]	728	0.94	1e-146	274/732(37%)	QPL15315.1
				NODE_5401_length_1803_cov_41.704233	1803	hypothetical protein [Quaranjavirus quaranfilense]	N) Meganola albula genome assembly, chromosome: 27	7826509	0.05	0.0002	70/94(74%)	OW388169.1
							N) Dermapteran orthomyxo-related virus OKIAV170 segment 5 cRNA sequence, sequence	1720	0.03	0.034	45/55(82%)	MT153559.1
						4/5 (segmented)	X) putative nucleocapsid [Old quarry swamp virus]	547	0.88	3e-82	174/535(33%)	AYP67576.1		≅ Complete new virus (5 segments)
							X) nucleoprotein [Hymenopteran orthomyxo-related virus OKIAV174]	542	0.83	2e-75	162/502(32%)	QPL15316.1
				NODE_5482_length_1784_cov_3.455755	1784	hypothetical protein CBPV_s2gp2 [Chronic bee paralysis virus]	N) PREDICTED: Diachasma alloeum 60S ribosomal protein L15 (LOC107038549), mRNA	752	0.01	0.0008	33/33(100%)	XM_015257720.1	Putative virion glycoprotein of insect viruses
						1/2 (segmented)	X) MAG: hypothetical protein [Xiangshan tombus-like virus]	499	0.74	3e-46	134/457(29%)	UDL14005.1		≅ Complete hypothetical protein (91%) + other genes
							X) hypothetical protein [Diaphorina citri associated C virus]	398	0.5	4e-45	104/301(35%)	ANG56341.1
				NODE_6430_length_1586_cov_127.485304	1586	hemagglutinin protein [Wellfleet Bay virus]	N) Darwinula stevensoni	36075	0.02	0.008	37/41(90%)	LR902516.1
						5/5 (segmented)	X) hemagglutinin [Hymenopteran orthomyxo-related virus OKIAV173]	512	0.85	2e-40	136/470(29%)	QMP82117.1		≅ Complete new virus (5 segments)
							X) hemagglutinin [Old quarry swamp virus]	500	0.84	2e-34	119/461(26%)	AYP67575.1
							X) hemagglutinin [Phasmatodean orthomyxo-related virus OKIAV172]	502	0.77	6e-32	118/430(27%)	QMP82330.1
				NODE_9237_length_1088_cov_2.417231	1088	hypothetical protein [Culex-associated Tombus-like virus]	N) Xiangshan tombus-like virus isolate Novel_29 segment 2 hypothetical protein and RNA dependent RNA polymerase genes, complete cds	2261	0.67	3e-45	502/749(67%)	OK491505.1	Transmembrane, coiled-coil.	Fragmented (33%)
						2/2 (segmented)	N) Odonatan tombus-related virus isolate OKIAV392 hypothetical protein gene, complete cds; and RNA-dependent RNA polymerase gene, partial cds	1731	0.45	1e-30	333/497(67%)	MW314703.1
							X) MAG: hypothetical protein [Xiangshan tombus-like virus]	312	0.81	5e-74	139/295(47%)	UDL14006.1
							X) MAG: RNA dependent RNA polymerase [Xiangshan tombus-like virus]	509	0.43	4e-55	93/160(58%)	UDL14007.1
				NODE_9609_length_1034_cov_2.719101	1034	hypothetical protein [Dendrolimus punctatus cypovirus 22]	N) No hit						Family of unknown function (DUF5887)
							X) hypothetical protein [Dendrolimus punctatus cypovirus 22]	288	0.65	5e-38	100/238(42%)	YP_009111323.1		Fragmented (82%) + other genes
							X) VP8 [Erinnyis ello cypovirus 2]	305	0.56	4e-28	76/197(39%)	QIQ51344.1
PRJNA283787	Male - adult	SRR2040481	Michigan, USA	NODE_50_length_7517_cov_22.795765	7517	RNA-dependent RNA polymerase [Hubei diptera virus 11]	N) Gudgenby Calliphora mononega-like virus strain GudgCaA_DN63315-6 putative nucleoprotein, hypothetical protein, putative glycoprotein, and RNA-dependent RNA polymerase genes, complete cds	12763	0.44	0.0	1947/2920(67%)	MT129693.1			Same virus as line 232
	[Diachasma alloeum]						X) RNA-dependent RNA polymerase [Gudgenby Calliphora mononega-like virus]	2075	0.77	0.0	1015/1955(52%)	QIJ70030.1
	[Parasitoid wasp - biological control]						X) RNA-dependent RNA polymerase [Hymenopteran anphe-related virus OKIAV71]	2036	0.76	0.0	809/1948(42%)	QPL15379.1
	[Distribution: North America]
				NODE_673_length_4108_cov_6.028374	4108	RNA-dependent RNA polymerase [Hubei chuvirus-like virus 1]	N) Soybean thrips chu-like virus 1 strain STN1 RNA-dependent RNA polymerase gene, complete cds	7386	0.02	3e-07	82/110(75%)	MT224150.1	Mononegavirales mRNA-capping region V, coiled-coil, transmembrane.		YES
							X) RdRp [Hymenopteran chu-related virus OKIAV147]	2201	0.96	0.0	410/1333(31%)	QPB73971.1		Fragmented RdRp (60%)
							X) RNA-dependent RNA polymerase [Soybean thrips chu-like virus 1]	2211	0.96	0.0	405/1350(30%)	QQP18758.1
				NODE_2417_length_2463_cov_47.818937	2463	polymerase PB2 [Quaranjavirus quaranfilense]	N) Photinus pyralis orthomyxo-like virus 2 PB2 gene, complete cds	2506	0.02	6e-07	48/54(89%)	MG972994.1
						1/5 (segmented)	X) polymerase PB2, partial [Phasmatodean orthomyxo-related virus OKIAV172]	808	0.86	4e-115	227/715(32%)	QMP82297.1
							X) polymerase PB2 [Hubei earwig virus 1]	804	0.85	1e-106	218/718(30%)	APG77881.1
				NODE_2445_length_2447_cov_17.875000	2447	polymerase PB1 [Quaranjavirus quaranfilense]	N) Wuhan Mothfly Virus strain WHDL03 PB1 (PB1) gene, complete cds	2146	0.17	2e-13	213/310(69%)	KM817627.1			YES - Same virus as line 242
						2/5 (segmented)	X) polymerase PB1, partial [Hymenopteran orthomyxo-related virus OKIAV173]	807	0.92	0.0	371/754(49%)	QMP82112.1
							X) polymerase PB1 [Phasmatodean orthomyxo-related virus OKIAV172]	797	0.92	0.0	361/756(48%)	QMP82248.1
				NODE_2914_length_2232_cov_40.534221	2232	polymerase acidic protein [Wellfleet Bay virus]	N) MAG: Byreska virus isolate BW2_Byreska polymerase-associated protein (PA) gene, complete cds	2211	0.03	2e-05	66/86(77%)	ON059768.1
						3/5 (segmented)	X) polymerase PA, partial [Hymenopteran orthomyxo-related virus OKIAV173]	755	0.95	5e-151	271/739(37%)	QMP82372.1
							X) PA [Old quarry swamp virus]	746	0.95	1e-141	269/742(36%)	AYP67572.1
				NODE_4189_length_1815_cov_18.944886	1815	hypothetical protein [Quaranjavirus quaranfilense]	N) Dermapteran orthomyxo-related virus OKIAV170 segment 5 cRNA sequence, sequence	1720	0.03	0.034	45/55(82%)	MT153559.1
						4/5 (segmented)	X) putative nucleocapsid [Old quarry swamp virus]	547	0.87	3e-82	174/535(33%)	AYP67576.1
							X) nucleoprotein [Hymenopteran orthomyxo-related virus OKIAV174]	542	0.82	2e-75	162/502(32%)	QPL15316.1
				NODE_5189_length_1581_cov_137.203801	1581	hemagglutinin protein [Wellfleet Bay virus]	N) Darwinula stevensoni	36075	0.02	0.008	37/41(90%)	LR902516.1
						5/5 (segmented)	X) hemagglutinin [Hymenopteran orthomyxo-related virus OKIAV173]	512	0.85	1e-35	135/471(29%)	QMP82117.1
							X) hemagglutinin [Old quarry swamp virus]	500	0.85	2e-29	118/461(26%)	AYP67575.1
				NODE_9002_length_980_cov_2.822703	980	RNA-dependent RNA polymerase [Hubei chuvirus-like virus 1]	N) No hit						No domains
							X) RNA-dependent RNA polymerase [Soybean thrips chu-like virus 1]	2211	0.91	1e-55	125/309(40%)	QQP18758.1		Fragmented RdRp (14%)
							X) RdRp [Hymenopteran chu-related virus OKIAV147]	2201	0.91	1e-46	110/305(36%)	QPB73971.1
				NODE_9461_length_926_cov_32.033295	926	putative glycoprotein [Hubei diptera virus 11]	N) No hit
							X) putative glycoprotein [Gudgenby Calliphora mononega-like virus]	663	0.8	2e-61	105/250(42%)	QIJ70029.1
							X) glycoprotein [Hymenopteran anphe-related virus OKIAV71]	667	0.77	5e-61	108/243(44%)	QPL15378.1
				NODE_11030_length_782_cov_112.470426	782	hypothetical protein 1 [Hubei diptera virus 11]	N) No hit
							X) putative nucleoprotein [Gudgenby Calliphora mononega-like virus]	458	0.85	4e-43	85/224(38%)	QIJ70027.1
							X) uncharacterized protein LOC105200674 isoform X2 [Solenopsis invicta]	614	0.86	8e-26	79/233(34%)	XP_011166629.2
				NODE_13622_length_614_cov_2.234347	614	RNA-dependent RNA polymerase [Hubei chuvirus-like virus 3]	N) Orthopteran chu-related virus OKIAV152 segment L RNA-dependent RNA polymerase gene, complete cds	6828	0.88	4e-34	364/545(67%)	MW288178.1	Mononegavirales RNA dependent RNA polymerase
							X) RNA dependent RNA polymerase [Turkana Chu-like virus]	2220	0.92	4e-85	123/189(65%)	UCW41650.1
							X) RNA-directed RNA polymerase [Mos8Chu0 chuvirus]	2221	0.99	2e-84	127/203(63%)	API61887.1
PRJNA731354	1 individual (adult female)	SRR14607675	Hamburg, Germany	TRINITY_DN23109_c0_g1_i1 len=3200 path=[0:0-3199]	3200	RNA-dependent RNA polymerase [Wenling narna-like virus 7]	N) Xiangshan narna-like virus isolate Novel_6 hypothetical protein gene, complete cds	3191	0.25	3e-50	481/716(67%)	OK491482.1	No domains	Complete new virus	YES
							X) hypothetical protein [Xiangshan narna-like virus]	1055	0.79	0.0	450/884(51%)	UDL13948.1
	[Ampulex compressa]
														Contig2: 3732nt
	[Parasitoid wasp]			Ampulexvirus narnaviri_3732nt_Contig2	3732		N) Xiangshan narna-like virus isolate Novel_6 hypothetical protein gene, complete cds	3191	0.22	4e-50	481/716(67%)
							X) hypothetical protein [Xiangshan narna-like virus]	1055	0.68	0.0	450/884(51%)
	[Distribution: Ethiopian and Oriental Regions, Brazil, USA (Hawaii) and Venezuela]

## Sheet: Table S3. Phylogeny details
Wasp species	Virus	Sequence name	Length (nt)	Complete	Best model (AIC)	BLAST best hit	Family	Genus	Included ICTV Genera	ICTV Outgroup
Ampulex compressa	1 - Ampulexvirus narnaviri	TRINITY_DN23109_c0_g1_i1 len=3200 path=[0:0-3199] (Ac_Contig1)	3732	Yes	BLOSUM62 +F (aa)	X) MAG: hypothetical protein [Xiangshan narna-like virus]	Narnaviridae	Unclassified Narnaviridae	Narnaviridae (Narnavirus)	Mitoviridae (Unclassified Mitovirus, Unuamitovirus, Duamitovirus, Kvaramitovirus)
Cotesia vestalis	1*- Cotesiavirus virgavi	NODE_4_length_9075_cov_59.732274 (Cv_Contig1)	9075	Yes	BLOSUM62 +F (aa)	X) MAG: RNA-dependent RNA polymerase [Sanya virga-like virus 1]	Virgaviridae	Unclassified Virgaviridae	Virgaviridae (Tobamovirus, Tobravirus, Pomovirus, Furovirus, Goravirus, Pecluvirus)	Togaviridae (Alphavirus)
Cotesia vestalis	2 - Cotesiavirus chinense	NODE_16_length_6636_cov_17.805916 (Cv_Contig3)	6636	No	VT+F (aa)	X) RNA-dependent RNA polymerase [Wuhan insect virus 16]	Unclassified Riboviria	Unclassified Riboviria (probably Bunyavirales)	Phenuiviridae (Phlebovirus, Hudivirus), Phasmaviridae (Orthophasmavirus, Wuhivirus)	Peribunyaviridae (Orthobunyavirus)
Cotesia vestalis	4 - Cotesiavirus orthomyxi	NODE_2779_length_2499_cov_185.302642 (Cv_RNA_segment_1)	2499	Yes	BLOSUM62+F (aa)	X) polymerase PB1 [Phasmatodean orthomyxo-related virus OKIAV172]	Orthomyxoviridae	Unclassified Orthomyxoviridae	Orthomyxoviridae (Alphainfluenzavirus, Quaranjavirus, Betainfluenzavirus,Thogotovirus)	Orthomyxoviridae (Isavirus)
Cotesia vestalis	5 - Cotesiavirus rhabdovi	NODE_1_length_12294_cov_202.674249_g0_i0 (Cv_Contig2)	12294	Yes		X) RdRp [Wuhan ant virus]	Rhabdoviridae	Unclassified Rhabdoviridae	Rhabdoviridae (Alphahymrhavirus, Alphadrosrhavirus, Betapaprhavirus, Betanemrhavirus, Betaricinrhavirus)	Rhabdoviridae (Betanemrhavirus)
Diachasma alloeum	1 - Diachasmavirus michiganense	NODE_7_length_11634_cov_96.224113 (Da_Contig1)	11634	Yes	VT+F (aa)	X) RNA-dependent RNA polymerase [Gudgenby Calliphora mononega-like virus]	Unclassified Mononegavirales	Unclassified Mononegavirales (probably Xinmoviridae)	Xinmoviridae (Alasvirus, Gambievirus, Gylbovirus, Madalivirus, Pelmivirus)	Lispiviridae (Phelinovirus)
Diachasma alloeum	2 - Diachasmavirus orthomyxi	NODE_3364_length_2456_cov_23.995419 (Da_RNA_segment_2)	2456	Yes	VT+F (aa)	X) polymerase PB1, partial [Hymenopteran orthomyxo-related virus OKIAV173]	Orthomyxoviridae	Unclassified Orthomyxoviridae	Orthomyxoviridae (Quaranjavirus)	Orthomyxoviridae (Alphainfluenzavirus, Betainfluenzavirus, Thogotovirus)
Diachasma alloeum	3 - Pterovirus diachasmae	NODE_673_length_4108_cov_6.028374 (Da_Contig2)	4108	No	VT+F (aa)	X) RdRp [Hymenopteran chu-related virus OKIAV147]	Chuviridae	Pterovirus	Chuviridae (Doliuvirus, Scarabeuvirus, Piscichuvirus)	Aliusviridae (Ollusvirus)
Ectemnius lituratus	1 - Alphahymrhavirus ectemnius	NODE_2_length_12682_cov_146.405077 (El_Contig1)	12682	Yes	VT+F (aa)	X) L polymerase RdRp [Lasius neglectus virus 2]	Rhabdoviridae	Alphahymrhavirus	Rhabdoviridae (Alphahymrhavirus, Betapaprhavirus, Betanemrhavirus, Betaricinrhavirus)	Rhabdoviridae (Betanemrhavirus)
Pemphredon lugubris	1 - Pemphredonvirus anglici	NODE_6_length_5813_cov_44.726464 (Pl_Contig1)	5813	No	BLOSUM62+F (aa)	X) hypothetical protein [Megastigmus ssRNA virus]	Unclassified Riboviria	Unclassified Riboviria (probably Virgaviridae)	Virgaviridae (Tobamovirus, Pomovirus, Goravirus, Pecluvirus, Tobravirus)	Togaviridae (Alphavirus)
Pemphredon lugubris	2 - Betapartitivirus pemphredoni	NODE_198_length_2397_cov_143.966810 (Pl_Contig2)	2397	Yes	VT+F (aa)	X) RNA-dependent RNA polymerase [Dill cryptic virus 2]	Partitiviridae	Betapartitivirus	Alphapartitivirus, Betapartitivirus	Partitiviridae (2 spp. Deltapartitivirus, 2 spp. Gammapartitivirus, Cryspovirus)
Pemphredon lugubris	3 - Mitovirus pemphredoni	NODE_1599_length_1098_cov_21.545544 (Pl_Contig6)	2141	No	VT+F (aa)	X) MAG: RNA-dependent RNA polymerase [Hangzhou mitovirus 4]	Mitoviridae	Mitovirus - unclassified Mitovirus	Unuamitovirus, Duamitovirus, Triamitovirus, Kvaramitovirus	Narnaviridae (Narnavirus)
Pemphredon lugubris	Unuamitovirus pemphredoni	Contig 13 (Pl_Contig7)	1056	No		X) RNA-dependent RNA polymerase [Entomophthora muscae mitovirus 2]	Mitoviridae	Unuamitovirus
Pemphredon lugubris	[known mitovirus]	Contig 10 (Pl_Contig10)	1143			N) Hubei narna-like virus 25 strain SCM51430 RNA-dependent RNA polymerase gene, complete cds, 100% query cover; 1054/1144(92%) id
Pemphredon lugubris	4 - Alphaendornavirus pemphredoni 1	Contig1 (Pl_Contig3)	3462	No	BLOSUM 62+F	X) polyprotein [Lily alphaendornavirus]	Endornaviridae	Alphaendornavirus	Alphaendornavirus, Betaendornavirus	Closteroviridae (Velarivirus )
Pemphredon lugubris	5 - Pemphredonvirus endornavi	Contig11 (Pl_Contig5)	14232	Yes	BLOSUM 62+F	X) MAG: putative polyprotein [Hallsjon virus]	Endornaviridae	Unclassified Endornaviridae	Alphaendornavirus, Betaendornavirus	Closteroviridae (Velarivirus )
Pemphredon lugubris	6 - Alphaendornavirus pemphredoni 2	Contig12 (Pl_Contig4)	11115	No	BLOSUM 62+F	X) polyprotein [Geranium carolinianum endornavirus]	Endornaviridae	Alphaendornavirus	Alphaendornavirus, Betaendornavirus	Closteroviridae (Velarivirus )
Telenomus podisi	1 (known virus)	NODE_14_length_8285_cov_136.921750	8285	Yes		N) Halyomorpha halys virus isolate Beltsville, complete genome 98% id	Iflaviridae	Unclassified iflaviridae	Iflavirus
		(Tp_Contig1)
